# Supplementary material for: Benefits and harms of 4-factor prothrombin complex concentrate for reversal of vitamin K antagonist associated bleeding: a systematic review and meta-analysis
Source: Springer Nature journal article supplement (doi:10.1007/s11239-017-1506-0), 2017-05-24
Supplement: MOESM1 [file 12312960]

## Appendix I. Full systematic search strategies.

### PubMed.

Date of search: 20 August 2015.

((("Vitamin K"[Mesh] OR vitamin K[tw] or VKA[tw] or Oral anticoagulant\*[tw] or Anticoagulant\*[tw] or Warfarin [tw] or Acenocoumarol[tw] or Sintrom[tw] or Sintrommitis[tw] or Phenprocoumon[tw] or Marcoumar[tw] or Coumarin[tw] or Coumarins[tw] or Coumarin derivate[tw] or Antivitamin K[tw])) AND ("Prothrombin"[Mesh] OR anticoagulant reversal[tw] or anticoagulation reversal[tw] or Prothrombin complex concentrate\*[tw] or Complex concentrate\*[tw] or Coagulation factor concentrate\*[tw] or PCC[tw] or Cofact[tw] or Beriplex[tw] or Octaplex[tw] or kcentra[tw] or ppsb[tw]))) NOT ("Animals"[Mesh]) NOT "Humans"[Mesh])

Annotation: language limit applied (English, Dutch, French and German). MeSH indexed animal studies excluded.

### Embase Classic + Embase

Date of search: 20 August 2015 via OvidSP.

1. anticoagulant agent/ or antivitamin k/ or exp coumarin anticoagulant/ or coumarin derivative/
2. (acenocoumarol or Sintrom or Sintrommitis or warfarin or vka or anticoagulant? or vitamin K or antivitamin? K or coumarin? or Phenprocoumon or Marcoumar).ab,kw,ti.
3. 1 or 2 [vitamin k antagonists]
4. prothrombin complex/
5. (pcc or prothrombin complex concentrate\* or ppsb or Beriplex or Octaplex or kcentra or anticoagulant reversal or anticoagulation reversal or complex concentrate\* or Coagulation factor concentrate\* or cofact).ab,kw,ti.
6. 4 or 5 [PCC]
7. 3 and 6
8. (animal/ or animal experiment/ or animal model/ or nonhuman/ or rat/ or mouse/ or (rat or rats or mouse or mice).ti.) not human/
9. 7 not 8 [excl. animal studies]
10. limit 9 to (dutch or english or french or german)
11. remove duplicates from 10

Annotation: language limit applied (English, Dutch, French and German). Animal studies were excluded by a search string using Emtree index terms and title words.

### Cochrane Central Register of Controlled Trials, Wiley Online Library

Date of search: 20 August 2015.

#1 vitamin K or VKA or Oral anticoagulant\* or Anticoagulant\* or Warfarin or Acenocoumarol or Sintrom or Sintrommitis or Phenprocoumon or Marcoumar or Coumarin or Coumarins or Coumarin derivate or Antivitamin K  
#2 anticoagulant reversal or anticoagulation reversal or Prothrombin complex concentrate\* or Complex concentrate\* or Coagulation factor concentrate\* or PCC or Cofact or Beriplex or Octaplex or kcentra or ppsb  
#1 AND #2

Annotation: no additional limits applied, no animal studies excluded. Fields searched: title, abstract and keywords
